# Supplementary material
Source: HighWire-hosted journal article supplement (https://bmjopen.bmj.com/content/15/2/e082241)
Supplement: inline-supplementary-material-1 [file inline-supplementary-material-1.pdf]

Supplementary appendix

Table of contents

| S. No. | Tables and figures      | Page No. |
|--------|-------------------------|----------|
| 1      | Supplementary Figure S1 | 3        |
| 2      | Supplementary Figure S2 | 4        |
| 3      | Supplementary Figure S3 | 5        |
| 4      | Supplementary Figure S4 | 6        |
| 5      | Supplementary Figure S5 | 7        |

| S. No. | Tables and figures     | Page No. |
|--------|------------------------|----------|
| 1      | Supplementary Table S1 | 8        |
| 2      | Supplementary Table S2 | 9        |
| 3      | Supplementary Table S3 | 10-12    |
| 4      | Supplementary Table S4 | 13-15    |
| 5      | Supplementary Table S5 | 16       |

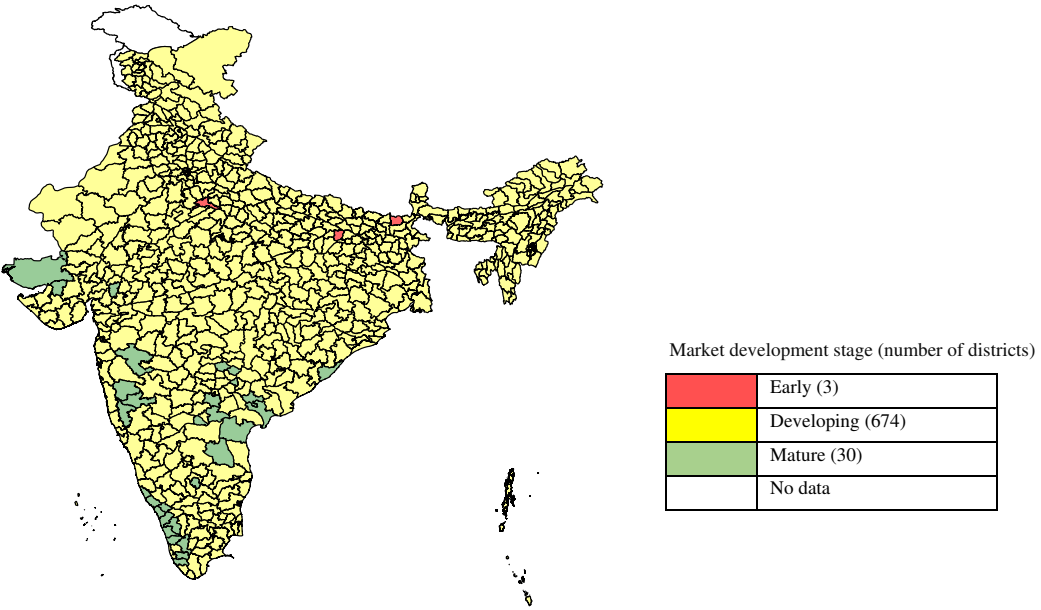

**Supplementary Figure S1:** Districts of India at different level of market development stage for four or more ANC, 2019-21

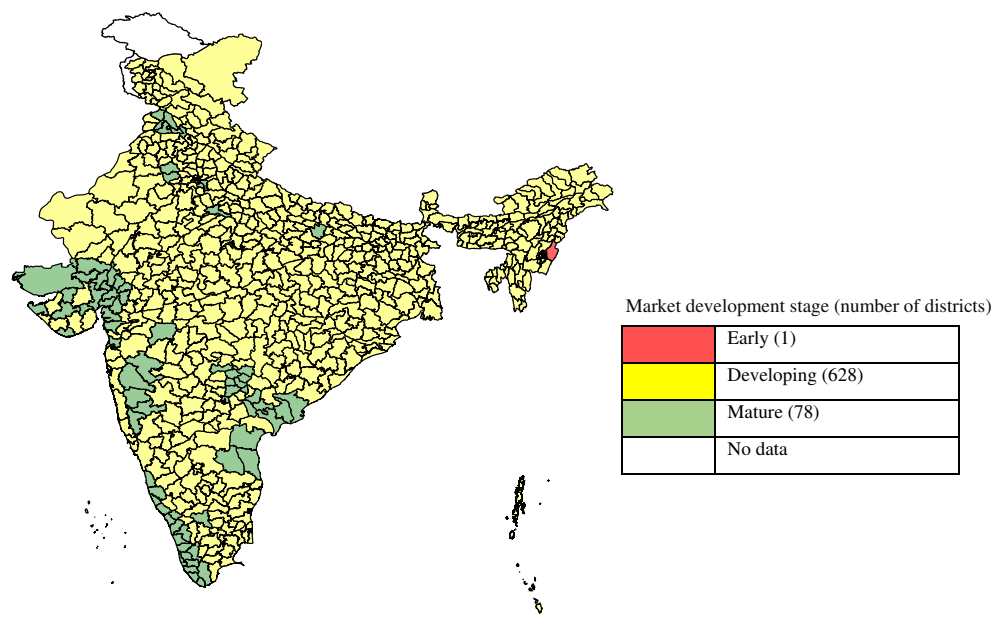

**Supplementary Figure S2:** Districts of India at different level of market development stage for institutional delivery, 2019-21



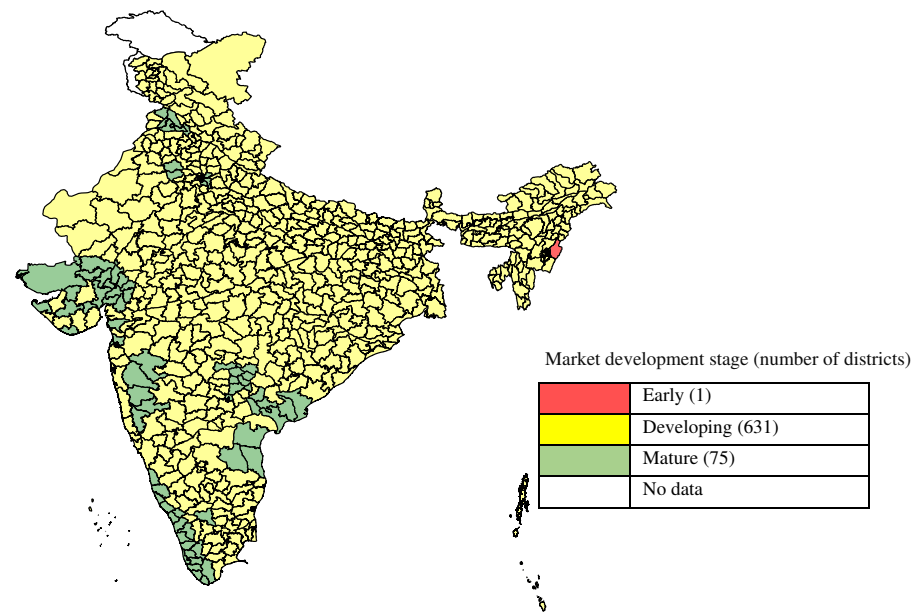

**Supplementary Figure S3:** Districts of India at different level of market development stage for PNC care among mothers, 2019-21

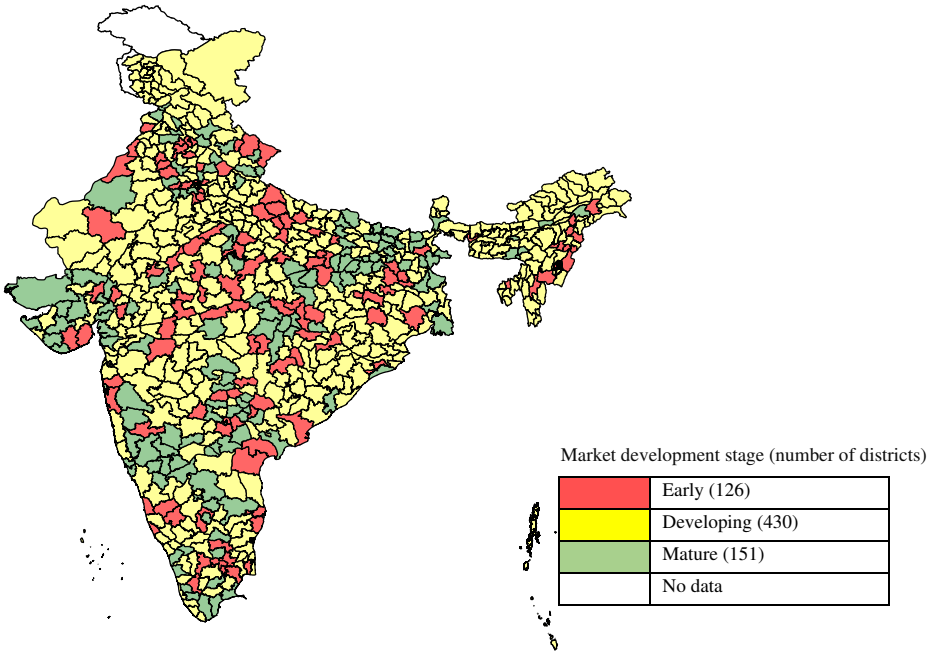

**Supplementary Figure S4:** Districts of India at different level of market development stage for care seeking of ARI among children, 2019-21

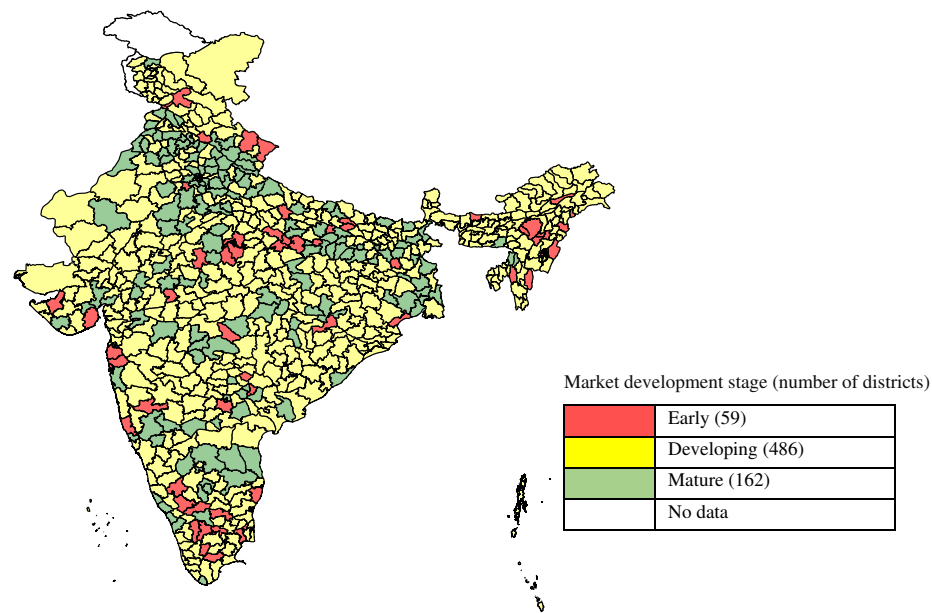

**Supplementary Figure S5:** Districts of India at different level of market development stage for care seeking for diarrhoea among children, 2019-21

Supplementary Table S1: Association of covariates with the outcome variables (NFHS 2019-21)

| Covariates                | Degrees of Freedom (df) | Chi-Square Statistic ( $\chi^2$ ) | P-Value |
|---------------------------|-------------------------|-----------------------------------|---------|
| Care seeking for ANC      |                         |                                   |         |
| Residence                 | 2                       | 4.0e+03                           | 0.000   |
| Age of women              | 4                       | 319.92                            | 0.000   |
| Mother's education        | 4                       | 7.2e+03                           | 0.000   |
| Wealth Index              | 8                       | 1.3e+04                           | 0.000   |
| Institutional delivery    |                         |                                   |         |
| Residence                 | 2                       | 7.2e+03                           | 0.000   |
| Age of women              | 4                       | 1.0e+03                           | 0.000   |
| Mother's education        | 4                       | 1.9e+04                           | 0.000   |
| Wealth Index              | 8                       | 3.2e+04                           | 0.000   |
| Care seeking for PNC      |                         |                                   |         |
| Residence                 | 1                       | 4.3e+03                           | 0.000   |
| Age of women              | 2                       | 386.73                            | 0.000   |
| Mother's education        | 2                       | 8.6e+03                           | 0.000   |
| Wealth Index              | 4                       | 1.6e+04                           | 0.000   |
| Care seeking for ARI      |                         |                                   |         |
| Residence                 | 2                       | 12.77                             | 0.002   |
| Age of women              | 4                       | 11.95                             | 0.018   |
| Mother's education        | 4                       | 34.81                             | 0.000   |
| Wealth Index              | 8                       | 78.54                             | 0.000   |
| Care seeking for diarrhea |                         |                                   |         |
| Residence                 | 2                       | 22.02                             | 0.000   |
| Age of women              | 4                       | 91.94                             | 0.000   |
| Mother's education        | 4                       | 62.07                             | 0.000   |
| Wealth Index              | 8                       | 97.66                             | 0.000   |

**Supplementary Table S2:** Classification criteria of districts according to the stages of market development for MCH indicators

| Stages of market development for MCH services | Early     | Developing                                                          | Mature                                                    |
|-----------------------------------------------|-----------|---------------------------------------------------------------------|-----------------------------------------------------------|
| Four or more ANC visits (4ANC)                | 4ANC <45% | 4ANC between 45-70% or >50% 4ANC availed from public facilities.    | 4ANC>70% with <50% 4ANC availed from public facilities    |
| Institutional delivery (POD)                  | POD <65%  | POD between 65-85% or >50% POD from public facilities               | POD>85% with <50% POD from public facilities              |
| PNC checkup for mother (PNC)                  | PNC <60%  | PNC between 60-80% or >50% PNC availed from public facilities.      | PNC>80% with <50% PNC availed from public facilities      |
| Treatment seeking for ARI (ARI)               | ARI <40%  | ARI between 40-70% or >50% treatment sought from public facilities. | ARI>70% with <50% treatment sought from public facilities |
| Treatment seeking for diarrhea (DIR)          | DIR<60%   | DIR between 60-80% or >50% treatment sought from public facilities  | DIR>80% with <50% treatment sought from public facilities |

**Supplementary Table S3 (a):** Trends in utilization of maternal healthcare services by public, private, and other health facilities across selected background characteristics in India, 2005-2021

|                                                   | 2005-06     |             |              |              | 2015-16       |              |              |               | 2019-21       |              |              |               |
|---------------------------------------------------|-------------|-------------|--------------|--------------|---------------|--------------|--------------|---------------|---------------|--------------|--------------|---------------|
| Four or more ANC visits (%)                       | Public      | Private     | Others       | Total        | Public        | Private      | Others       | Total         | Public        | Private      | Others       | Total         |
| <b>Residence</b>                                  |             |             |              |              |               |              |              |               |               |              |              |               |
| Urban                                             | 32.1        | 58.4        | 9.5          | 62.4         | 40.8          | 42.5         | 16.8         | 66.4          | 46.8          | 31.7         | 21.4         | 68.6          |
| Rural                                             | 41.1        | 42.2        | 16.7         | 27.7         | 54.2          | 24.7         | 21.1         | 44.8          | 61.2          | 15.9         | 22.9         | 54.5          |
| <b>Age of women</b>                               |             |             |              |              |               |              |              |               |               |              |              |               |
| 15-19 years                                       | 39.5        | 41.6        | 19.0         | 30.0         | 54.3          | 22.5         | 23.2         | 54.1          | 58.1          | 12.8         | 29.1         | 60.1          |
| 20-29 years                                       | 36.9        | 49.6        | 13.5         | 40.1         | 49.6          | 30.4         | 20.0         | 53.0          | 57.3          | 19.5         | 23.2         | 58.5          |
| 30+ years                                         | 36.9        | 51.3        | 11.8         | 31.1         | 46.6          | 36.0         | 17.4         | 46.3          | 54.1          | 25.9         | 20.0         | 58.4          |
| <b>Mother's education (in years of schooling)</b> |             |             |              |              |               |              |              |               |               |              |              |               |
| Up to 5 years                                     | 49.6        | 34.8        | 15.7         | 20.4         | 61.0          | 19.3         | 19.7         | 33.7          | 69.4          | 10.4         | 20.2         | 44.9          |
| 6-10 years                                        | 36.8        | 49.6        | 13.6         | 56.2         | 53.0          | 27.0         | 20.1         | 59.5          | 60.4          | 16.4         | 23.2         | 61.4          |
| 11+ years                                         | 20.3        | 69.4        | 10.3         | 80.1         | 33.3          | 48.4         | 18.4         | 69.7          | 43.8          | 33.0         | 23.1         | 68.6          |
| <b>Wealth index</b>                               |             |             |              |              |               |              |              |               |               |              |              |               |
| Poorest                                           | 58.5        | 23.3        | 18.2         | 12.1         | 68.9          | 11.9         | 19.2         | 25.0          | 74.5          | 6.2          | 19.3         | 41.8          |
| Poorer                                            | 52.0        | 31.1        | 17.0         | 21.1         | 63.0          | 16.5         | 20.5         | 44.4          | 66.8          | 11.2         | 21.9         | 53.5          |
| Middle                                            | 46.1        | 38.3        | 15.6         | 36.6         | 54.9          | 24.6         | 20.6         | 57.2          | 60.0          | 16.6         | 23.4         | 62.6          |
| Richer                                            | 37.8        | 48.8        | 13.4         | 53.0         | 44.3          | 35.6         | 20.1         | 65.8          | 50.5          | 25.2         | 24.4         | 67.5          |
| Richest                                           | 21.0        | 69.1        | 9.9          | 77.3         | 28.0          | 55.0         | 17.0         | 73.0          | 36.0          | 41.6         | 22.4         | 71.8          |
| <b>Unweighted Number</b>                          | <b>6830</b> | <b>7706</b> | <b>2083</b>  | <b>16619</b> | <b>50583</b>  | <b>23206</b> | <b>15649</b> | <b>89438</b>  | <b>65141</b>  | <b>17474</b> | <b>18820</b> | <b>101435</b> |
| <b>Institutional delivery (%)</b>                 |             |             |              |              |               |              |              |               |               |              |              |               |
| <b>Residence</b>                                  |             |             |              |              |               |              |              |               |               |              |              |               |
| Urban                                             | 28.9        | 41.6        | 29.5         | 70.5         | 46.1          | 44.2         | 9.7          | 90.3          | 52.1          | 42.6         | 5.3          | 94.7          |
| Rural                                             | 15.4        | 15.5        | 69.1         | 30.9         | 55.5          | 21.8         | 22.7         | 77.3          | 65.7          | 22.5         | 11.8         | 88.2          |
| <b>Age of women</b>                               |             |             |              |              |               |              |              |               |               |              |              |               |
| 15-19 years                                       | 19.5        | 17.8        | 62.7         | 37.3         | 61.4          | 23.4         | 15.3         | 84.7          | 71.6          | 19.0         | 9.4          | 90.6          |
| 20-29 years                                       | 20.5        | 23.6        | 55.9         | 44.1         | 54.7          | 28.4         | 16.9         | 83.1          | 64.0          | 26.9         | 9.1          | 90.9          |
| 30+ years                                         | 15.1        | 20.9        | 64.0         | 36.0         | 46.5          | 29.4         | 24.1         | 75.9          | 55.8          | 32.2         | 12.0         | 88.0          |
| <b>Mother's education (in years of schooling)</b> |             |             |              |              |               |              |              |               |               |              |              |               |
| Up to 5 years                                     | 13.5        | 10.5        | 76.0         | 24.0         | 53.2          | 14.3         | 32.6         | 67.4          | 66.1          | 13.9         | 20.0         | 80.0          |
| 6-10 years                                        | 30.0        | 31.9        | 38.1         | 61.9         | 59.1          | 28.7         | 12.1         | 87.9          | 68.1          | 24.3         | 7.6          | 92.4          |
| 11+ years                                         | 22.4        | 64.5        | 13.1         | 86.9         | 41.5          | 53.8         | 4.7          | 95.3          | 50.2          | 47.1         | 2.7          | 97.3          |
| <b>Wealth index</b>                               |             |             |              |              |               |              |              |               |               |              |              |               |
| Poorest                                           | 8.7         | 4.5         | 86.8         | 13.2         | 52.9          | 8.2          | 38.9         | 61.1          | 68.9          | 8.9          | 22.2         | 77.8          |
| Poorer                                            | 15.0        | 9.3         | 75.7         | 24.3         | 61.9          | 15.0         | 23.1         | 76.9          | 71.9          | 16.8         | 11.4         | 88.7          |
| Middle                                            | 23.6        | 17.6        | 58.9         | 41.1         | 60.2          | 26.5         | 13.3         | 86.7          | 67.3          | 26.0         | 6.7          | 93.3          |
| Richer                                            | 28.5        | 31.7        | 39.8         | 60.2         | 50.6          | 41.2         | 8.2          | 91.8          | 57.3          | 38.6         | 4.2          | 95.8          |
| Richest                                           | 23.4        | 62.1        | 14.4         | 85.6         | 34.0          | 62.1         | 3.9          | 96.1          | 39.5          | 58.4         | 2.2          | 97.8          |
| <b>Unweighted Number</b>                          | <b>9122</b> | <b>8622</b> | <b>19086</b> | <b>36830</b> | <b>105615</b> | <b>42570</b> | <b>42612</b> | <b>190797</b> | <b>114952</b> | <b>40280</b> | <b>21611</b> | <b>176843</b> |
| <b>PNC checkup for mother (%)</b>                 |             |             |              |              |               |              |              |               |               |              |              |               |
| <b>Residence</b>                                  |             |             |              |              |               |              |              |               |               |              |              |               |
| Urban                                             | 38.4        | 61.6        | 0.0          | 59.5         | 48.1          | 50.1         | 1.9          | 74.7          | 53.9          | 46.1         | 0.0          | 84.9          |
| Rural                                             | 47.5        | 52.5        | 0.0          | 23.5         | 66.0          | 29.8         | 4.2          | 61.0          | 73.1          | 26.9         | 0.0          | 74.9          |
| <b>Age of women</b>                               |             |             |              |              |               |              |              |               |               |              |              |               |

|                                                   |             |             |          |              |              |              |             |               |              |              |          |               |
|---------------------------------------------------|-------------|-------------|----------|--------------|--------------|--------------|-------------|---------------|--------------|--------------|----------|---------------|
| 15-19 years                                       | 48.7        | 51.3        | 0.0      | 26.5         | 67.9         | 29.8         | 2.3         | 64.8          | 77.5         | 22.5         | 0.0      | 71.8          |
| 20-29 years                                       | 43.9        | 56.1        | 0.0      | 35.5         | 61.1         | 35.6         | 3.3         | 66.7          | 69.0         | 31.0         | 0.0      | 78.3          |
| 30+ years                                         | 39.2        | 60.8        | 0.0      | 29.2         | 55.6         | 40.5         | 3.9         | 61.0          | 61.9         | 38.1         | 0.0      | 77.0          |
| <b>Mother's education (in years of schooling)</b> |             |             |          |              |              |              |             |               |              |              |          |               |
| Up to 5 years                                     | 55.1        | 44.9        | 0.0      | 17.2         | 71.8         | 21.8         | 6.5         | 51.4          | 81.6         | 18.4         | 0.0      | 65.3          |
| 6-10 years                                        | 45.9        | 54.1        | 0.0      | 50.3         | 63.3         | 34.1         | 2.6         | 71.0          | 72.6         | 27.4         | 0.0      | 80.0          |
| 11+ years                                         | 24.5        | 75.5        | 0.0      | 77.9         | 41.4         | 57.6         | 1.0         | 80.4          | 50.6         | 49.4         | 0.0      | 87.3          |
| <b>Wealth index</b>                               |             |             |          |              |              |              |             |               |              |              |          |               |
| Poorest                                           | 66.7        | 33.4        | 0.0      | 8.6          | 78.4         | 13.9         | 7.7         | 44.7          | 87.9         | 12.1         | 0.0      | 60.9          |
| Poorer                                            | 60.0        | 40.0        | 0.0      | 17.6         | 75.1         | 20.2         | 4.8         | 58.9          | 80.1         | 19.9         | 0.0      | 73.7          |
| Middle                                            | 56.2        | 43.8        | 0.0      | 31.3         | 65.7         | 31.5         | 2.9         | 70.4          | 71.6         | 28.4         | 0.0      | 81.9          |
| Richer                                            | 45.3        | 54.8        | 0.0      | 48.5         | 52.6         | 45.5         | 1.9         | 76.9          | 59.6         | 40.4         | 0.0      | 86.3          |
| Richest                                           | 25.8        | 74.2        | 0.0      | 75.2         | 33.7         | 65.3         | 1.0         | 81.7          | 39.8         | 60.2         | 0.0      | 90.5          |
| <i>Unweighted Number</i>                          | <b>7232</b> | <b>7499</b> | <b>0</b> | <b>14731</b> | <b>78741</b> | <b>35669</b> | <b>4079</b> | <b>118489</b> | <b>98077</b> | <b>36625</b> | <b>0</b> | <b>134702</b> |

**Supplementary Table S3 (b):** Trends in utilization of child healthcare services by public, private, and other health facilities across selected background characteristics in India, 2005-2021

|                                          | 2005-06 |         |        |       | 2015-16 |         |        |       | 2019-21 |         |        |       |
|------------------------------------------|---------|---------|--------|-------|---------|---------|--------|-------|---------|---------|--------|-------|
|                                          | Public  | Private | Others | Total | Public  | Private | Others | Total | Public  | Private | Others | Total |
| Care seeking for ARI among children (%)  |         |         |        |       |         |         |        |       |         |         |        |       |
| Residence                                |         |         |        |       |         |         |        |       |         |         |        |       |
| Urban                                    | 12.5    | 79.6    | 7.9    | 81.6  | 24.5    | 73.4    | 2.1    | 91.2  | 27.7    | 71.4    | 0.9    | 55.8  |
| Rural                                    | 13.1    | 73.3    | 13.6   | 73.7  | 21.3    | 72.2    | 6.5    | 84.4  | 27.8    | 67.8    | 4.4    | 56.7  |
| Age of women                             |         |         |        |       |         |         |        |       |         |         |        |       |
| 15-19 years                              | 7.3     | 78.3    | 14.3   | 77.4  | 23.6    | 71.0    | 5.4    | 80.4  | 29.0    | 71.0    | 0.0    | 63.0  |
| 20-29 years                              | 13.9    | 74.5    | 11.6   | 74.9  | 22.1    | 72.6    | 5.4    | 87.0  | 27.2    | 69.2    | 3.6    | 56.6  |
| 30+ years                                | 12.6    | 74.2    | 13.2   | 76.6  | 22.1    | 72.5    | 5.4    | 84.1  | 29.3    | 66.4    | 4.3    | 55.2  |
| Mother's education (years of schooling)  |         |         |        |       |         |         |        |       |         |         |        |       |
| Up to 5 years                            | 12.8    | 74.6    | 12.6   | 74.1  | 19.4    | 72.9    | 7.7    | 83.5  | 26.3    | 68.9    | 4.8    | 57.0  |
| 6-10 years                               | 15.7    | 71.3    | 13.1   | 77.7  | 26.2    | 69.7    | 4.2    | 87.6  | 32.0    | 64.5    | 3.5    | 57.1  |
| 11+ years                                | 5.1     | 89.0    | 5.9    | 80.9  | 20.4    | 77.0    | 2.7    | 89.1  | 23.8    | 74.0    | 2.1    | 55.0  |
| Wealth index                             |         |         |        |       |         |         |        |       |         |         |        |       |
| Poorest                                  | 11.1    | 74.6    | 14.3   | 66.8  | 18.6    | 72.7    | 8.7    | 80.1  | 26.8    | 65.0    | 8.2    | 58.2  |
| Poorer                                   | 11.2    | 74.4    | 14.4   | 75.1  | 25.0    | 67.3    | 7.7    | 85.0  | 30.4    | 68.2    | 1.4    | 57.4  |
| Middle                                   | 20.0    | 68.7    | 11.3   | 77.0  | 25.8    | 69.3    | 4.9    | 88.2  | 32.3    | 65.2    | 2.5    | 55.2  |
| Richer                                   | 10.9    | 78.4    | 10.8   | 82.9  | 23.3    | 75.2    | 1.5    | 89.9  | 26.4    | 73.0    | 0.6    | 57.7  |
| Richest                                  | 10.8    | 82.0    | 7.2    | 83.2  | 17.0    | 82.0    | 1.0    | 92.8  | 20.2    | 76.6    | 3.2    | 51.9  |
| Unweighted number                        | 350     | 1334    | 216    | 1900  | 1701    | 3896    | 278    | 5875  | 1226    | 1994    | 93     | 3313  |
| Care seeking diarrhea among children (%) |         |         |        |       |         |         |        |       |         |         |        |       |
| Residence                                |         |         |        |       |         |         |        |       |         |         |        |       |
| Urban                                    | 15.3    | 69.9    | 14.8   | 73.8  | 22.2    | 74.4    | 3.4    | 80.3  | 28.7    | 69.1    | 2.2    | 78.1  |
| Rural                                    | 18.8    | 65.1    | 16.1   | 67.5  | 23.6    | 68.1    | 8.4    | 76.5  | 30.9    | 65.9    | 3.2    | 75.8  |
| Age of women                             |         |         |        |       |         |         |        |       |         |         |        |       |
| 15-19 years                              | 20.6    | 68.6    | 10.8   | 63.9  | 22.0    | 72.3    | 5.7    | 70.5  | 26.4    | 68.6    | 4.9    | 77.1  |
| 20-29 years                              | 17.6    | 67.8    | 14.6   | 70.0  | 23.4    | 69.7    | 6.9    | 78.3  | 29.2    | 68.2    | 2.7    | 76.7  |
| 30+ years                                | 17.6    | 60.8    | 21.6   | 68.6  | 22.6    | 69.6    | 7.8    | 75.9  | 35.7    | 60.8    | 3.5    | 75.1  |
| Mother's education (years of schooling)  |         |         |        |       |         |         |        |       |         |         |        |       |
| Up to 5 years                            | 18.5    | 63.7    | 17.8   | 66.3  | 21.5    | 68.4    | 10.1   | 75.8  | 30.9    | 65.0    | 4.1    | 75.7  |
| 6-10 years                               | 19.7    | 67.2    | 13.1   | 72.4  | 27.8    | 67.3    | 4.9    | 77.8  | 31.8    | 65.7    | 2.5    | 76.2  |
| 11+ years                                | 8.9     | 79.4    | 11.8   | 77.6  | 18.9    | 77.0    | 4.2    | 80.7  | 27.5    | 70.4    | 2.2    | 77.7  |
| Wealth index                             |         |         |        |       |         |         |        |       |         |         |        |       |
| Poorest                                  | 23.7    | 59.1    | 17.2   | 60.0  | 21.6    | 67.0    | 11.4   | 72.7  | 31.3    | 64.0    | 4.7    | 75.4  |
| Poorer                                   | 18.3    | 62.6    | 19.2   | 66.9  | 26.5    | 65.1    | 8.4    | 76.4  | 31.0    | 65.7    | 3.3    | 73.7  |
| Middle                                   | 18.6    | 65.5    | 16.0   | 70.2  | 26.3    | 67.9    | 5.8    | 78.9  | 33.0    | 65.1    | 1.8    | 75.9  |
| Richer                                   | 16.2    | 69.2    | 14.6   | 73.8  | 23.3    | 72.6    | 4.1    | 80.4  | 28.8    | 69.8    | 1.4    | 80.1  |
| Richest                                  | 10.8    | 78.9    | 10.3   | 80.6  | 16.3    | 81.4    | 2.4    | 83.4  | 24.9    | 73.1    | 2.1    | 80.0  |
| Unweighted number                        | 670     | 1854    | 455    | 2979  | 4815    | 11075   | 1158   | 17048 | 4337    | 6822    | 329    | 11488 |



**Supplementary Table S4 (a):** Adjusted percentage\* (obtained after the multinomial logit regression analysis) of maternal healthcare services utilization by public, private and other health facilities across selected socioeconomic characteristics in India, 2019-21

|                                                   | 2005-06 |         |        | 2015-16 |         |        | 2019-21 |         |        |
|---------------------------------------------------|---------|---------|--------|---------|---------|--------|---------|---------|--------|
|                                                   | Public  | Private | Others | Public  | Private | Others | Public  | Private | Others |
| <b>Four or more ANC visits</b>                    |         |         |        |         |         |        |         |         |        |
| <b>Residence</b>                                  |         |         |        |         |         |        |         |         |        |
| Urban                                             | 43.1    | 48.5    | 8.4    | 47.2    | 39.4    | 13.4   | 56.0    | 27.5    | 16.5   |
| Rural                                             | 63.7    | 27.5    | 8.7    | 66.2    | 21.1    | 12.7   | 70.7    | 14.6    | 14.8   |
| <b>Age of women</b>                               |         |         |        |         |         |        |         |         |        |
| 15-19 years                                       | 59.6    | 30.2    | 10.2   | 61.5    | 23.9    | 14.7   | 67.3    | 15.3    | 17.4   |
| 20-29 years                                       | 57.3    | 33.8    | 8.9    | 59.8    | 26.6    | 13.6   | 66.5    | 17.4    | 16.1   |
| 30+ years                                         | 60.0    | 32.6    | 7.4    | 59.5    | 28.0    | 12.5   | 66.6    | 20.3    | 13.0   |
| <b>Mother's education (in years of schooling)</b> |         |         |        |         |         |        |         |         |        |
| Up to 5 years                                     | 66.9    | 25.4    | 7.7    | 68.6    | 19.9    | 11.5   | 76.8    | 11.4    | 11.9   |
| 6-10 years                                        | 50.9    | 39.0    | 10.2   | 58.8    | 27.3    | 13.9   | 68.6    | 15.5    | 15.9   |
| 11+ years                                         | 28.6    | 61.2    | 10.3   | 40.6    | 44.8    | 14.5   | 54.2    | 28.0    | 17.8   |
| <b>Wealth index</b>                               |         |         |        |         |         |        |         |         |        |
| Poorest                                           | 74.2    | 19.1    | 6.7    | 77.1    | 13.7    | 9.2    | 81.7    | 8.7     | 9.7    |
| Poorer                                            | 66.4    | 25.6    | 8.0    | 72.1    | 16.8    | 11.1   | 74.2    | 11.9    | 13.9   |
| Middle                                            | 60.6    | 29.9    | 9.5    | 63.8    | 22.0    | 14.2   | 67.3    | 15.9    | 16.9   |
| Richer                                            | 50.3    | 40.0    | 9.8    | 54.3    | 30.7    | 15.0   | 59.5    | 22.3    | 18.2   |
| Richest                                           | 29.9    | 60.1    | 10.0   | 37.3    | 48.5    | 14.2   | 45.6    | 35.6    | 18.8   |
| Total                                             | 58.1    | 33.2    | 8.6    | 59.7    | 27.4    | 12.9   | 66.6    | 18.2    | 15.2   |
| <b>Institutional delivery</b>                     |         |         |        |         |         |        |         |         |        |
| <b>Residence</b>                                  |         |         |        |         |         |        |         |         |        |
| Urban                                             | 32.5    | 37.0    | 30.5   | 46.0    | 43.4    | 10.7   | 54.8    | 39.7    | 5.5    |
| Rural                                             | 17.3    | 13.1    | 69.6   | 55.6    | 20.4    | 24.0   | 66.2    | 19.9    | 13.8   |
| <b>Age of women</b>                               |         |         |        |         |         |        |         |         |        |
| 15-19 years                                       | 20.5    | 16.1    | 63.4   | 53.0    | 18.8    | 28.2   | 64.9    | 14.3    | 20.8   |
| 20-29 years                                       | 22.9    | 20.5    | 56.7   | 55.8    | 26.4    | 17.8   | 65.7    | 24.1    | 10.2   |
| 30+ years                                         | 18.1    | 18.2    | 63.7   | 50.2    | 29.9    | 19.9   | 61.1    | 27.5    | 11.4   |
| <b>Mother's education (in years of schooling)</b> |         |         |        |         |         |        |         |         |        |
| Up to 5 years                                     | 14.6    | 8.8     | 76.6   | 52.9    | 17.5    | 29.6   | 65.3    | 16.2    | 18.4   |
| 6-10 years                                        | 33.8    | 27.1    | 39.1   | 57.4    | 29.1    | 13.5   | 66.8    | 25.2    | 8.0    |
| 11+ years                                         | 28.5    | 58.6    | 12.9   | 42.2    | 51.7    | 6.1    | 52.2    | 44.5    | 3.3    |
| <b>Wealth index</b>                               |         |         |        |         |         |        |         |         |        |
| Poorest                                           | 8.8     | 4.0     | 87.3   | 51.1    | 7.5     | 41.4   | 65.4    | 7.4     | 27.2   |
| Poorer                                            | 15.4    | 7.9     | 76.7   | 60.3    | 11.8    | 27.9   | 71.6    | 14.1    | 14.3   |
| Middle                                            | 26.1    | 13.9    | 60.1   | 60.3    | 22.3    | 17.5   | 69.4    | 22.1    | 8.4    |
| Richer                                            | 33.4    | 26.4    | 40.2   | 53.2    | 35.8    | 11.0   | 61.6    | 33.1    | 5.3    |
| Richest                                           | 28.7    | 56.5    | 14.8   | 38.2    | 56.1    | 5.7    | 45.5    | 51.9    | 2.6    |
| Total                                             | 59.0    | 21.4    | 19.6   | 52.3    | 28.3    | 19.4   | 64.1    | 25.3    | 10.5   |
| <b>PNC checkup for mother</b>                     |         |         |        |         |         |        |         |         |        |
| <b>Residence</b>                                  |         |         |        |         |         |        |         |         |        |
| Urban                                             | 49.6    | 50.4    | 0.0    | 51.4    | 46.2    | 2.4    | 58.6    | 41.4    | 0.0    |

|                         |      |      |     |      |      |     |      |      |     |
|-------------------------|------|------|-----|------|------|-----|------|------|-----|
| Rural                   | 62.4 | 37.6 | 0.0 | 72.1 | 23.5 | 4.4 | 78.0 | 22.0 | 0.0 |
| Age of women            |      |      |     |      |      |     |      |      |     |
| 15-19 years             | 59.1 | 40.9 | 0.0 | 71.7 | 25.5 | 2.9 | 65.2 | 25.9 | 0.0 |
| 20-29 years             | 58.7 | 41.3 | 0.0 | 66.8 | 29.7 | 3.5 | 64.7 | 29.0 | 0.0 |
| 30+ years               | 59.5 | 40.5 | 0.0 | 62.5 | 32.9 | 4.6 | 64.5 | 28.9 | 0.0 |
| Mother's education      |      |      |     |      |      |     |      |      |     |
| (in years of schooling) |      |      |     |      |      |     |      |      |     |
| Up to 5 years           | 64.7 | 35.3 | 0.0 | 74.8 | 18.9 | 6.4 | 84.2 | 15.8 | 0.0 |
| 6-10 years              | 56.9 | 43.1 | 0.0 | 69.0 | 28.3 | 2.6 | 76.7 | 23.3 | 0.0 |
| 11+ years               | 32.9 | 67.1 | 0.0 | 46.1 | 52.5 | 1.3 | 56.3 | 43.7 | 0.0 |
| Wealth index            |      |      |     |      |      |     |      |      |     |
| Poorest                 | 70.1 | 29.9 | 0.0 | 80.1 | 12.5 | 7.4 | 89.6 | 10.4 | 0.0 |
| Poorer                  | 64.9 | 35.1 | 0.0 | 78.8 | 16.4 | 4.8 | 83.0 | 17.0 | 0.0 |
| Middle                  | 64.5 | 35.5 | 0.0 | 69.7 | 27.4 | 2.9 | 75.3 | 24.7 | 0.0 |
| Richer                  | 54.8 | 45.2 | 0.0 | 57.0 | 41.0 | 2.0 | 63.7 | 36.3 | 0.0 |
| Richest                 | 32.8 | 67.2 | 0.0 | 38.0 | 60.8 | 1.2 | 45.4 | 54.6 | 0.0 |
| Total                   | 58.9 | 41.0 | 0.0 | 63.0 | 33.0 | 3.9 | 72.6 | 27.4 | 0.0 |

\*Adjusted for caste, religion, parity, and household decision making by women

**Supplementary Table S4 (b):** Adjusted percentage\* (obtained after the multinomial logit regression analysis) of child healthcare services utilization by public, private and other health facilities across selected socioeconomic characteristics in India, 2019-21

|                                                   | 2005-06 |         |        | 2015-16 |         |        | 2019-21 |         |        |
|---------------------------------------------------|---------|---------|--------|---------|---------|--------|---------|---------|--------|
|                                                   | Public  | Private | Others | Public  | Private | Others | Public  | Private | Others |
| <b>Care seeking for ARI</b>                       |         |         |        |         |         |        |         |         |        |
| <b>Residence</b>                                  |         |         |        |         |         |        |         |         |        |
| Urban                                             | 16.4    | 81.4    | 2.2    | 26.4    | 73.3    | 0.4    | 27.8    | 72.1    | 0.1    |
| Rural                                             | 24.1    | 71.9    | 4.0    | 28.6    | 70.7    | 0.6    | 32.8    | 67.0    | 0.2    |
| <b>Age of women</b>                               |         |         |        |         |         |        |         |         |        |
| 15-19 years                                       | 21.8    | 73.4    | 4.8    | 28.6    | 69.9    | 1.5    | 26.9    | 73.1    | 0.0    |
| 20-29 years                                       | 22.5    | 74.4    | 3.1    | 28.0    | 71.4    | 0.6    | 30.3    | 69.5    | 0.2    |
| 30+ years                                         | 21.2    | 74.4    | 4.4    | 27.8    | 71.8    | 0.4    | 35.1    | 64.7    | 0.3    |
| <b>Mother's education (in years of schooling)</b> |         |         |        |         |         |        |         |         |        |
| Up to 5 years                                     | 22.0    | 73.9    | 4.1    | 27.3    | 71.9    | 0.7    | 32.9    | 66.7    | 0.4    |
| 6-10 years                                        | 24.9    | 72.2    | 2.9    | 31.0    | 68.6    | 0.4    | 35.3    | 64.6    | 0.2    |
| 11+ years                                         | 15.7    | 82.8    | 1.6    | 24.2    | 75.4    | 0.4    | 25.3    | 74.7    | 0.0    |
| <b>Wealth index</b>                               |         |         |        |         |         |        |         |         |        |
| Poorest                                           | 20.8    | 74.8    | 4.5    | 29.8    | 69.3    | 0.9    | 35.5    | 64.0    | 0.5    |
| Poorer                                            | 25.8    | 69.1    | 5.1    | 31.8    | 67.2    | 1.1    | 34.2    | 65.8    | 0.0    |
| Middle                                            | 27.8    | 68.7    | 3.5    | 29.4    | 70.6    | 0.1    | 36.0    | 63.6    | 0.3    |
| Richer                                            | 19.6    | 78.1    | 2.3    | 27.7    | 72.1    | 0.2    | 26.7    | 73.3    | 0.0    |
| Richest                                           | 14.3    | 84.5    | 1.2    | 18.8    | 80.9    | 0.3    | 21.7    | 78.3    | 0.0    |
| Total                                             | 22.1    | 74.3    | 3.6    | 27.9    | 71.5    | 0.0    | 31.5    | 68.3    | 0.0    |
| <b>Care seeking for diarrhoea</b>                 |         |         |        |         |         |        |         |         |        |
| <b>Residence</b>                                  |         |         |        |         |         |        |         |         |        |
| Urban                                             | 16.1    | 69.8    | 14.2   | 22.8    | 73.7    | 3.5    | 31.2    | 66.2    | 2.6    |
| Rural                                             | 24.1    | 59.7    | 16.3   | 27.2    | 65.4    | 7.4    | 35.6    | 61.6    | 2.8    |
| <b>Age of women</b>                               |         |         |        |         |         |        |         |         |        |
| 15-19 years                                       | 25.4    | 62.8    | 11.8   | 20.4    | 75.3    | 4.3    | 33.9    | 61.8    | 4.3    |
| 20-29 years                                       | 21.9    | 63.7    | 14.4   | 25.9    | 67.7    | 6.4    | 33.2    | 64.4    | 2.4    |
| 30+ years                                         | 21.3    | 58.0    | 20.7   | 26.5    | 67.5    | 6.0    | 37.6    | 58.8    | 3.6    |
| <b>Mother's education (in years of schooling)</b> |         |         |        |         |         |        |         |         |        |
| Up to 5 years                                     | 21.9    | 60.3    | 17.8   | 26.5    | 64.3    | 9.2    | 36.9    | 59.3    | 3.8    |
| 6-10 years                                        | 25.7    | 62.0    | 12.3   | 28.0    | 67.0    | 5.0    | 38.1    | 59.6    | 2.3    |
| 11+ years                                         | 12.8    | 75.6    | 11.6   | 21.3    | 76.1    | 2.6    | 27.1    | 70.9    | 2.0    |
| <b>Wealth index</b>                               |         |         |        |         |         |        |         |         |        |
| Poorest                                           | 24.5    | 57.7    | 17.8   | 26.1    | 62.9    | 11.0   | 36.1    | 59.4    | 4.6    |
| Poorer                                            | 23.9    | 58.3    | 17.8   | 31.1    | 61.9    | 7.0    | 38.8    | 58.5    | 2.7    |
| Middle                                            | 25.8    | 57.7    | 16.5   | 28.4    | 66.6    | 4.9    | 38.3    | 60.2    | 1.5    |
| Richer                                            | 18.7    | 67.3    | 14.1   | 23.4    | 73.2    | 3.5    | 31.6    | 66.7    | 1.7    |
| Richest                                           | 13.7    | 76.2    | 10.1   | 18.2    | 78.8    | 3.1    | 24.4    | 72.9    | 2.7    |
| Total                                             | 22.0    | 62.3    | 15.7   | 25.9    | 67.9    | 6.2    | 34.4    | 62.8    | 2.7    |

\*Adjusted for caste, religion, parity, and household decision making by women

**Supplementary Table S5:** Districts by stages of private sector market development for MCH services in India, 2019-21

|                              | Four or more ANC visits |            | Institutional delivery |            | PNC checkup for mother |            | Care seeking for ARI |            | Care seeking for diarrhoea |            |
|------------------------------|-------------------------|------------|------------------------|------------|------------------------|------------|----------------------|------------|----------------------------|------------|
|                              | Number                  | Percentage | Number                 | Percentage | Number                 | Percentage | Number               | Percentage | Number                     | Percentage |
| Stages of market development |                         |            |                        |            |                        |            |                      |            |                            |            |
| Early                        | 3                       | 0.4        | 1                      | 0.1        | 1                      | 0.1        | 126                  | 17.8       | 59                         | 8.3        |
| Developing                   | 674                     | 95.3       | 628                    | 88.8       | 631                    | 89.3       | 430                  | 60.8       | 486                        | 68.7       |
| Mature                       | 30                      | 4.2        | 78                     | 11         | 75                     | 10.6       | 151                  | 21.4       | 162                        | 22.9       |
